# Supplementary material
Source: publisher figshare collection journal article supplement (https://acs.figshare.com/ndownloader/files/4617475)
Supplement: Supplementary file 1 [file 4617475]

## Supporting Information for

“An Experimental and Theoretical Investigation of the Decomposition of Lithiated Hydroxyl Side Chain Amino Acids” by S. J. Ye and P. B. Armentrout

Descriptions of the isomers of the  $(AA - F)$ ,  $Li^+(AA - F)$ , and  $(F)Li^+(AA - F)$  species where  $AA = \text{Ser and Thr}$  and  $F = \text{H}_2\text{O}, \text{CO}_2$ , and  $\text{XCHO}$  ( $X = \text{H}$  for Ser and  $\text{CH}_3$  for Thr) as well as the transition states and intermediates along the potential energy surfaces for elimination of  $F$  from the lithiated amino acid complexes. Tables S1 and S2 provide the relative energies and key geometric parameters of all species lying along these potential energy surfaces. Figure S1 shows the optimized structures of  $(AA - F)$  and  $(\text{H}_2\text{O})Li^+(AA - F)$ . Additional figures show alternate potential energy surfaces for elimination of  $\text{H}_2\text{O}$  (S3 and S4),  $\text{CO}_2$  (S6),  $\text{HCHO}$  (S9), and the rearrangements of the  $(\text{H}_2\text{O})Li^+\text{Aca}$  (S2),  $(\text{CO}_2)Li^+\text{May}$  (S5), and  $(\text{HCHO})Li^+\text{Cay}$  products (S7 and S8). This information is available free of charge via the Internet at <http://pubs.acs.org>.

### **S1. Dehydration products: $(AA - \text{H}_2\text{O})$ , $Li^+(AA - \text{H}_2\text{O})$ , and $(\text{H}_2\text{O})Li^+(AA - \text{H}_2\text{O})$ .**

The neutral Apa and cis-Aba (where the  $\text{C}_4$  backbone has a cis orientation) have almost identical backbone structures, Figure S1, with an intramolecular  $\text{NH}\cdots\text{O}=\text{C}$  hydrogen bond formed between the amino hydrogen and carboxylic oxygen. However, cis-Aba is calculated to be 18 – 20 kJ/mol higher than the trans-Aba ground structure, Table 2, which is lower in energy mainly because repulsion between the OH and  $\text{CH}_3$  groups in cis-Aba is relieved. When the double bond is located at the end of the  $\text{C}_4$  chain, an alternative isomer, 2-amino-3-butenic acid (3-Aba), lying 50 – 59 kJ/mol above the trans-Aba ground structure, is obtained. The four-membered ring lactone molecules, Abl and Ambl, have only one isomer and lie 70 – 81 kJ/mol and 64 – 74 kJ/mol above the Apa and trans-Aba isomers, respectively. The three-membered ring aziridine molecules, Aca and Amca, have two isomers distinguished by whether the carboxylic hydroxyl group is cis or trans to the carbonyl. Aca-trans-OH (Amca-trans-OH) lies lower in energy because an  $\text{OH}\cdots\text{N}$  hydrogen bond is formed, Figure S1, and lies 77 – 91 (75 – 90) kJ/mol above the ground state Apa (Aba) isomers. Aca-cis-OH (Amca-cis-OH) lies another 5 – 8 (6 – 9) kJ/mol higher in energy and is stabilized by an internal  $\text{OH}\cdots\text{OC}$  hydrogen bond.

In  $Li^+\text{Apa}$  and  $Li^+\text{Aba}$ , the  $Li^+$  binds directly to the amino nitrogen and carbonyl oxygen atom after disrupting the  $\text{NH}\cdots\text{O}=\text{C}$  hydrogen bond. A similar bidentate binding motif is seen in

the  $M^+Gly$  system.<sup>1-3</sup> Upon binding of  $Li^+$ , the intramolecular hydrogen bond in the carboxylic group becomes 0.03 – 0.04 Å longer than the corresponding neutral Apa or Aba, Figure 3. Such elongation is mainly because of electron delocalization from the carbonyl oxygen to the lithium cation, which weakens this hydrogen bond. Also note that the relative energies among the three isomers of  $Li^+Aba$  are smaller than those in neutral Aba system, Tables 2 and S1. For the cyclic lactone and aziridine species, lithium cations bind in [N,CO] bidentate conformations, Figure 3. This requires only that the amine group rotate for Abl and Ambl, but the constrained geometry of the lactone ring leads to relatively long  $Li^+-O$  and  $Li^+-N$  bond lengths, Table S2. For Aca and Amca, lithium cation binding also leads to elongation of the hydrogen bond in the carboxylic acid group relative to the Aca-cis-OH and Amca-cis-OH neutrals. In the zwitterionic form of these complexes, formed by attaching  $Li^+$  to the trans-OH isomers, the hydrogen bond is retained but shifted to a  $NH\cdots O$  configuration. These  $ZW[CO_2^-]$  complexes are 20 – 22 and 16 – 17 kJ/mol higher in energy than the charge-solvated [N,CO]  $Li^+Aca$  and  $Li^+Amca$  complexes, respectively, Table S1. The corresponding  $M3[COOH]$  structures of the  $ZW[CO_2^-]$  complexes are not stable when optimized and collapse to  $M6[CO]$  structures, which lie 37 – 43 and 40 – 46 kJ/mol above the ground  $M1[N,CO]$  structures.

For the hydrated systems,  $(H_2O)Li^+(AA - H_2O)$ , the water binds directly to the other side of  $Li^+$  while keeping the rest of the molecule nearly unchanged, Table S2. Both the  $Li^+-O$  and  $Li^+-N$  distances increase by  $\sim 0.04$  Å as compared to those of the corresponding  $Li^+(AA - H_2O)$  conformers, Table S2. Similar elongation (by  $\sim 0.03$  Å) of these distances was found upon hydration of  $Na^+Gly$ .<sup>4</sup> For hydrated  $Li^+Aca$  and  $Li^+Amca$  complexes, the charge-solvated [N,CO] form is again more stable and favored over the  $ZW[CO_2^-]$  by 24 – 25 and 18 – 22 kJ/mol.

**S2. Products of Carbon Dioxide Elimination:  $(AA - CO_2)$ ,  $Li^+(AA - CO_2)$ , and  $(CO_2)Li^+(AA - CO_2)$ .** The lowest energy isomers for  $(AA - CO_2)$  are ethanol-2-amine (Eam) in the Ser system and propanol-2-amine (Pam) in the Thr system, respectively, Figure S1, where an intramolecular  $N\cdots HO$  hydrogen bond (2.27 and 2.23 Å, respectively) is formed between the amine nitrogen and hydroxyl hydrogen. A zwitterionic isomer of E(P)am is  $HOCH_2C^-HN^+H_3$ , methoxy ammonium ylide (May) for Ser, and  $HOCH(CH_3)C^-HN^+H_3$ , ethoxy ammonium ylide (Eay) for Thr, where the nitrogen is positively charged and the alpha carbon is negatively charged. There are two conformers close in energy for these zwitterionic molecules. The lower

energy conformer, May(Eay)-cis-OH, has two relatively long-range hydrogen bonds,  $\text{N}^+\text{H}\cdots\text{OH}$  and  $\text{OH}\cdots\text{C}^-$  (2.42 and 2.45 Å for May and 2.41 and 2.39 Å for Eay, respectively), Figure S1. Not surprisingly, the zwitterionic ylide isomer is much less stable than the corresponding alcohol amine isomer, lying 240 – 248 (247 – 253) kJ/mol above Eam (Pam). The May(Eay)-trans-OH conformer has only the  $\text{N}^+\text{H}\cdots\text{OH}$  hydrogen bond (2.27 and 2.13 Å for May and Eay, respectively) and lies 13 – 15 (16 – 17) kJ/mol above the cis conformer. The shorter hydrogen bond distances in both cis and trans Eay conformers as compared to those of May are clearly a result of a methyl group inductive effect.

$\text{Li}^+$  binds to the alcohol amine and its zwitterionic ylide form in  $[\text{N},\text{OH}]$  and  $[\text{C}^-,\text{OH}]$  bidentate configurations, respectively, as shown in Figure 3, after disrupting the hydrogen bonds in neutral E(P)am and M(E)ay.  $\text{Li}^+\text{May}$  lies 197 – 206 kJ/mol above  $\text{Li}^+\text{Eam}$  and  $\text{Li}^+\text{Eay}$  lies 203 – 210 kJ/mol above  $\text{Li}^+\text{Pam}$ , Table S1. It is worth noting that the relative energy of  $\text{Li}^+\text{M(E)ay}$  compared to  $\text{Li}^+\text{E(P)am}$  is smaller than the excitation energy of M(E)ay vs. E(P)am by about 40 kJ/mol. This is because the negatively charged alpha carbon is stabilized by complexation to the lithium cation. The TS for transformation between  $\text{Li}^+\text{May}$  and  $\text{Li}^+\text{Eam}$  is calculated to lie 325 – 342 kJ/mol above the ground  $\text{Li}^+\text{Eam}$  structure, and 127 – 136 kJ/mol above  $\text{Li}^+\text{May}$ . Thus, although the latter complex is relatively unstable, it cannot spontaneously rearrange to the lower energy form.

In the  $(\text{CO}_2)\text{Li}^+(\text{AA} - \text{CO}_2)$  bis-ligand complexes,  $\text{CO}_2$  preferentially binds directly to the other side of the lithium cation of the  $\text{Li}^+(\text{AA} - \text{CO}_2)$  complexes mentioned above in an end-on orientation. Among these complexes,  $(\text{CO}_2)\text{Li}^+\text{Eam}$  has the lowest energy, followed by  $(\text{CO}_2)\text{Li}^+\text{May}$ , which is 137 – 164 kJ/mol higher in energy. Likewise,  $(\text{CO}_2)\text{Li}^+\text{Pam}$  is lower than  $(\text{CO}_2)\text{Li}^+\text{Eay}$  by 145 – 171 kJ/mol.

**S3. Products of Aldehyde Loss:  $(\text{AA} - \text{XCHO})$ ,  $\text{Li}^+(\text{AA} - \text{XCHO})$ , and  $(\text{XCHO})\text{Li}^+(\text{AA} - \text{XCHO})$ .** The neutral molecules formed upon aldehyde elimination from Ser and Thr are the same. The lowest energy isomer is glycine (Gly) where two intramolecular  $\text{N}(\text{H})_2\cdots\text{OC}$  hydrogen bonds (2.84 Å) are formed between the amino hydrogen atoms and carbonyl oxygen. More detailed information about Gly calculated at the same level of theory has been elucidated elsewhere.<sup>1</sup> The next higher energy isomer considered is 2-amino-1,1-dihydroxy-ethene (Ade). There are two conformers close in energy for this diol molecule. The Ade-trans-NH conformer has  $\text{HN}\cdots\text{HO}$  and  $\text{HO}\cdots\text{HO}$  intramolecular hydrogen bonds (2.12 and

2.20 Å, respectively), Figure S1. It is calculated to lie 86 – 96 kJ/mol above Gly. The cis conformer has NH...OH and HO...HO hydrogen bonds, where the former is about 0.3 Å longer than the HN...HO hydrogen bond in the trans conformer. Therefore, the cis conformer lies 19 – 22 kJ/mol higher in energy than the trans conformer. The highest energy isomer considered is carboxy ammonium ylide (Cay), HO(CO)C<sup>-</sup>HN<sup>+</sup>H<sub>3</sub>. Similar to May and Eay, Cay also has two conformations. Cay-cis-OH lies 113 – 124 kJ/mol above Gly and has N<sup>+</sup>H...OC and OH...OC hydrogen bonds (1.78 and 2.26 Å, respectively). It is therefore 15 – 16 kJ/mol lower in energy than the trans conformer, which has only the first hydrogen bond (1.72 Å). The Cay-cis-OH structure can be formed by shifting the hydroxyl hydrogen in the Ade-trans-NH structure to the amine nitrogen. The TS for this transformation is calculated to be 39 – 48 kJ/mol above Ade-trans-NH or 1 – 7 kJ/mol below Cay-cis-OH once ZPE is included (2 – 7 above Cay-cis-OH without ZPE).

For all of these (AA – XCHO) isomers, Li<sup>+</sup> favors binding in a bidentate configuration: [N,CO] for Gly, [N,OH] for Ade, and [COOH] for Cay, Figure 3. Li<sup>+</sup>Gly has the lowest energy of all three isomers, with Li<sup>+</sup>Ade and Li<sup>+</sup>Cay being higher in energy by 114 – 117 and 111 – 117 kJ/mol, respectively. For Li<sup>+</sup>Ade, the [OH,OH] bidentate conformer lies 29 – 32 kJ/mol above the [N,OH] conformer, which is consistent with the fact the –NH<sub>2</sub> group has stronger bonds to alkali metal cations than the –OH functional group.<sup>1</sup>

The aldehydes prefer binding via their carbonyl group directly on the other side of Li<sup>+</sup> in the Li<sup>+</sup>(AA – XCHO) complex. The lowest energy structure is (XCHO)Li<sup>+</sup>Gly, followed by (XCHO)Li<sup>+</sup>Ade and (XCHO)Li<sup>+</sup>Cay, where the latter are comparable in energy. In all three cases, the (CH<sub>3</sub>CHO)Li<sup>+</sup>(Thr – CH<sub>3</sub>CHO) complexes are 21 – 42 kJ/mol more stable than the analogous (HCHO)Li<sup>+</sup>(Ser – HCHO) complexes. This is because the more polarizable acetaldehyde binds more strongly to Li<sup>+</sup>(AA – XCHO) than formaldehyde, by calculated differences (without BSSE corrections) of 17 – 18 kJ/mol for Li<sup>+</sup>Gly, 17 – 19 kJ/mol for Li<sup>+</sup>Ade, and 12 – 16 kJ/mol for Li<sup>+</sup>Cay.

**S4. Intermediates and Transition States: H<sub>2</sub>O Loss.** From PC<sub>N</sub>, Figure 4, the loosely bound water molecule can easily move to a more stable position by binding directly to the lithium cation to form (H<sub>2</sub>O)Li<sup>+</sup>Aca[ZW], Figure S2. Transfer of a proton from the nitrogen to the carboxylate group occurs by passing TS<sub>Z</sub> and requires little energy because of the short

NH...O hydrogen bond involved. This forms IM<sub>Z</sub> in which Aca is bound to Li<sup>+</sup> through its carbonyl, with the water ligand on the opposite side. Rotation about the C–C<sub>α</sub> bond consumes 43 – 45 kJ/mol of energy (44 – 47 kJ/mol for Thr system) and leads to the rate-limiting step in this transformation, TS<sub>ZR1</sub>, which lies 80 – 92 kJ/mol below TS<sub>NPT</sub> (72 – 85 kJ/mol in the Thr case). Thus, this transformation has enough energy to occur at the threshold for elimination of water. The IM<sub>ZR1</sub> intermediate binds to Li<sup>+</sup> in an [N,CO] binding mode, but the carboxylic acid hydrogen is trans to the carbonyl. Rotation of this group passes TS<sub>ZR2</sub> and forms the ground conformer of (H<sub>2</sub>O)Li<sup>+</sup>Aca, in which the hydroxyl group is cis to the carbonyl, Figure S2.

An alternative pathway found for generating Li<sup>+</sup>(AA – H<sub>2</sub>O) is the transfer of a hydrogen atom from the side-chain hydroxyl oxygen of Ser to the hydroxyl group of the carboxylic acid. The complete potential energy surface including all transition states and intermediates along this pathway for the Li<sup>+</sup>Ser case is presented in Figure S3. (Li<sup>+</sup>Thr is very similar both in energetic and structural information and is therefore not shown.) Relative energies and some critical geometric parameters for the transition states and intermediates of both systems are included in Tables S1 and S2, respectively. The mechanism starts as in Figure 4 to form IM<sub>N2</sub>, but instead of rotating the hydroxyl group of the carboxylic acid, the side-chain hydroxyl group is rotated to form IM<sub>O</sub> (where the subscript indicates the atom from which the hydrogen atom used to form the water originates), in which there is a long-range OH...OH hydrogen bond (2.42 Å). TS<sub>O</sub> and IM<sub>O</sub> are nearly isoenergetic lying 50 – 61 kJ/mol above the reactant complex (54 – 64 kJ/mol in the Thr case). From IM<sub>O</sub>, the hydrogen is transferred from the carboxylic acid group to the side-chain hydroxyl in a four-center TS to form a water molecule and a new CO bond, yielding the four-membered ring lactone. Because the hydrogen transfer is long range and there are considerable steric constraints associated with the formation of the lactone ring, the energy of TS<sub>OPT</sub> is 263 – 281 kJ/mol above the reactants, 87 – 109 kJ/mol above TS<sub>NPT</sub>. (For the Thr case, the energies are 259 – 275 and 85 – 112 kJ/mol, respectively.) Other placements of the lithium cation were also considered, but we found none that yielded a lower barrier for this rearrangement. Once past TS<sub>OPT</sub>, the system falls into a product-like complex that can easily lose water, PC<sub>O</sub>. PC<sub>O</sub> lies 66 – 72 kJ/mol above the ground state of the (H<sub>2</sub>O)Li<sup>+</sup>Abl complex (66 – 71 kJ/mol for the analogous species in the Thr case). Loss of the bidentate Abl and Amb1 ligands requires ~60 and ~70 kJ/mol, respectively, more energy than loss of water, but both product asymptotes lie below the energy of TS<sub>OPT</sub>. Thus, the thresholds for observation of the

products of reactions 4a,  $\text{Li}^+(\text{AA} - \text{H}_2\text{O})$ , and 4b,  $\text{Li}^+(\text{H}_2\text{O})$  should be the same, but the experimental observations discussed in the manuscript do not support this conclusion.

An additional pathway explored for generating  $\text{Li}^+(\text{AA} - \text{H}_2\text{O})$  is the transfer of a hydrogen atom from  $\text{C}_\alpha$  to the side-chain hydroxyl oxygen of Ser or Thr. The complete potential energy surface including all transition states and intermediates along this pathway for the  $\text{Li}^+\text{Ser}$  case is presented in Figure S4. ( $\text{Li}^+\text{Thr}$  is very similar both in energetic and structural information and is therefore not shown.) Relative energies and some critical geometric parameters for the transition states and intermediates for both systems are included in Tables S1 and S2. Starting from the ground structure of the reactants,  $\text{M1}[\text{N},\text{CO},\text{OH}]\text{-cis-OH}$ , the side-chain oxygen rotates  $\sim 50^\circ$  along the  $\text{C}_\alpha\text{-C}_\beta$  bond (Table S2) to reach transition state  $\text{TS}_\text{C}$  (where the subscript C stands for the atom supplying the hydrogen atom), which costs 53 – 65 kJ/mol (56 – 66 for  $\text{Li}^+\text{Thr}$ ), Table S2. The system then further rotates in the same direction for  $\sim 40^\circ$ , while keeping the rest of the amino acid backbone nearly unchanged, to reach intermediate  $\text{IM}_\text{C}$ , lying 31 – 39 kJ/mol (35 – 42 for  $\text{Li}^+\text{Thr}$ ) higher than the reactants. It is worth noting that the hydroxyl oxygen forms a  $\text{C}_\beta\text{O}\cdots\text{HN}$  hydrogen bond with the amino hydrogen (2.15 and 2.03 Å for  $\text{Li}^+\text{Ser}$  and  $\text{Li}^+\text{Thr}$ , respectively) in  $\text{IM}_\text{C}$ , which is similar to that in  $\text{M1}[\text{N},\text{CO}]$ , Figure S4. In  $\text{IM}_\text{C}$ , the hydroxyl oxygen is situated fairly close to the alpha carbon hydrogen ( $\text{HO}\cdots\text{HC}_\alpha$  distance of  $\sim 2.7$  Å). Next, the hydroxyl oxygen further rotates  $\sim 50^\circ$  in the same direction to bring the oxygen atom even closer to the  $\text{C}_\alpha$  hydrogen, which induces cleavage of the  $\text{C}_\alpha\text{-H}$  bond (extended  $\text{C}_\alpha\text{-H}$  distances of 1.56 and 1.54 Å for  $\text{Li}^+\text{Ser}$  and  $\text{Li}^+\text{Thr}$ , respectively), transfer of the hydrogen to the hydroxyl oxygen forming a  $\text{H}_2\text{O}$  moiety, and elongation of the  $\text{C}_\beta\text{-OH}$  bond (by  $\sim 0.15$  Å). Because the proton transfer is fairly long range and also involves the disruption of the  $\text{C}_\beta\text{O}\cdots\text{HN}$  hydrogen bond in  $\text{IM}_\text{C}$ , the corresponding transition state,  $\text{TS}_\text{CPT}$ , sits 231 – 254 kJ/mol (241 – 265 for the corresponding  $\text{Li}^+\text{Thr}$   $\text{TS}_\text{CPT}$  case) above reactants. This TS also lies 44 – 56 (56 – 71) kJ/mol above  $\text{TS}_\text{NPT}$ , the lowest energy TSs found for dehydration. After  $\text{TS}_\text{CPT}$  proton transfer, the ion falls into a relatively stable product-like complex,  $\text{PC}_\text{C}$ , where the  $\text{H}_2\text{O}$  moiety forms a hydrogen bond with one of the amino group hydrogens (bond distances of 1.94 and 1.96 Å for  $\text{Li}^+\text{Ser}$  and  $\text{Li}^+\text{Thr}$ , respectively).  $\text{PC}_\text{C}$  is situated 25 – 42 kJ/mol (30 – 56 for  $\text{Li}^+\text{Thr}$ ) above the reactants and 53 – 58 kJ/mol higher than the ground conformer of  $(\text{H}_2\text{O})\text{Li}^+\text{Apa}$  (67 – 71 kJ/mol higher than the  $(\text{H}_2\text{O})\text{Li}^+(\text{trans-Aba})$  ground conformer in the  $\text{Li}^+\text{Thr}$  system). Because of

the large energy release from  $\text{TS}_{\text{CPT}}$  to  $\text{PC}_{\text{C}}$  and the short distance between the  $\text{H}_2\text{O}$  ligand and  $\text{Li}^+$ , it seems likely that the ground conformers of  $(\text{H}_2\text{O})\text{Li}^+\text{Apa}$  and  $(\text{H}_2\text{O})\text{Li}^+(\text{trans-Aba})$  could be formed transiently. In any event,  $\text{H}_2\text{O}$  elimination from the  $\text{PC}(\text{H}_2\text{O})$  complexes or the lower energy  $(\text{H}_2\text{O})\text{Li}^+\text{Apa}$  and  $(\text{H}_2\text{O})\text{Li}^+(\text{trans-Aba})$  complexes is calculated to be more favorable than the elimination of the bidentate Apa and Aba ligands by  $\sim 80$  and  $100$  kJ/mol, Table S1, respectively. However, the rate-limiting transition states lie above both product asymptotes, Figure S4, indicating that the thresholds for observation of the products of reactions 4a,  $\text{Li}^+(\text{AA} - \text{H}_2\text{O})$ , and 4b,  $\text{Li}^+(\text{H}_2\text{O})$  should be the same. This contrasts with the experimental observations.

For the  $\text{Li}^+\text{Thr}$  system, there is another possible pathway for water elimination that involves proton transfer from the methyl group to the side-chain hydroxyl oxygen. The energy of the transition state for this pathway,  $\text{TS}_{\text{CPT2}}$ , is calculated to be comparable to the one discussed above,  $\text{TS}_{\text{CPT}}$ , Table S1. Briefly, the proton transfer process starts from the  $\text{M1}[\text{N},\text{CO},\text{OH}]\text{-cis-OH}$  ground conformer of  $\text{Li}^+\text{Thr}$ . One of the methyl hydrogen atoms rotates  $\sim 50^\circ$  along the  $\text{C}_\beta\text{-C}_\alpha$  bond to align itself with the hydroxyl oxygen. In addition, rotation of the hydroxyl hydrogen along the  $\text{O-C}_\beta$  bond by  $\sim 40^\circ$  facilitates abstraction of the methyl hydrogen atom. Formation of the tight  $\text{TS}_{\text{CPT2}}$  transition state involves cleavage of the  $\text{HO-C}_\beta$  bond (bond distance of  $2.26 \text{ \AA}$ ) and elongation of the  $\text{H-C}_\alpha$  distance (from  $1.09$  to  $1.24 \text{ \AA}$ ).  $\text{TS}_{\text{CPT2}}$  lies  $244 - 277$  kJ/mol above the ground reactant complex. After passing through this transition state, the ion falls into a stable product-like complex,  $(\text{H}_2\text{O})\text{Li}^+(3\text{-Aba})$ , which is only  $4 - 25$  kJ/mol above the ground conformer of  $\text{Li}^+\text{Thr}$ . This complex can easily eliminate either  $\text{H}_2\text{O}$  or  $3\text{-Aba}$ , but again the rate-limiting transition state lies above both product asymptotes, Table S1.

**S5. Intermediates and Transition States:  $\text{CO}_2$  Loss.**  $(\text{CO}_2)\text{Li}^+\text{M(E)ay}$  is the product complex formed by  $\text{CO}_2$  elimination after passing the rate-limiting  $\text{TS}_{\text{DCC}}$ , Figure 5. However, this product is calculated to lie  $202 - 211$  ( $208 - 215$ ) kJ/mol above its stable  $(\text{CO}_2)\text{Li}^+\text{E(P)am}$  isomer. Calculations were performed to investigate possible rearrangements of  $(\text{CO}_2)\text{Li}^+\text{May}$  to  $(\text{CO}_2)\text{Li}^+\text{Eam}$ . The complete PES including all TSs and intermediates along this pathway for the Ser case is presented in Figure S5. ( $\text{Li}^+\text{Thr}$  is similar both in energetic and structural information and therefore is not shown.) Relative energetics and critical geometric parameters for the TSs and intermediates are included in Tables S1 and S2, respectively.

Briefly, starting from  $(\text{CO}_2)\text{Li}^+\text{May}$ , the ion reaches  $\text{TS}_{\text{EPT}}$  by transferring one of the ammonium hydrogen atoms toward the anionic carbon while still maintaining  $[\text{C}^-, \text{OH}]$  bidentate binding with lithium cation. This 1,2-hydrogen shift consumes 120 – 130 kJ/mol of energy and then the ion forms a stable intermediate,  $\text{IM}_{\text{EPT}}$ , in which  $\text{Li}^+$  interacts primarily with the hydroxyl group of Eam, although there is an agostic interaction with the  $\text{CH}_2$  group as well. Therefore,  $\text{IM}_{\text{EPT}}$  lies 85 – 92 kJ/mol above the ground  $(\text{CO}_2)\text{Li}^+\text{Eam}$  structure. The rest of the PES involves rotation of the amino group along the N–C bond followed by rotation along the C–C bond to allow both the  $\text{NH}_2$  and OH functional groups to interact with  $\text{Li}^+$ , Figure S5. Similar to rotational transitions in other reaction pathways considered here, this requires a small activation energy, only 6 – 9 kJ/mol, for  $\text{IM}_{\text{EPT}}$  to reach  $(\text{CO}_2)\text{Li}^+\text{Eam}$ , Table S1.

Another reaction pathway found for generating  $\text{Li}^+(\text{Ser} - \text{CO}_2)$  involves the transfer of a hydrogen atom from the carboxylic acid to the  $\text{C}_\alpha$  of Ser, as shown in Figure S6. Briefly, starting from  $\text{IM}_{\text{DR1}} = \text{M1}[\text{N}, \text{CO}, \text{OH}]$ -trans-OH, the four-centered rate-limiting  $\text{TS}_{\text{DPT2}}$  involves a direct shift of a hydrogen atom from the carboxylic acid to  $\text{C}_\alpha$  and is calculated to be 319 – 330 kJ/mol above the  $\text{Li}^+\text{Ser}$  ground state. Although this pathway generates the stable Eam fragment,  $\text{TS}_{\text{DPT2}}$  is over 130 kJ/mol higher than the experimental measurement and 131 – 152 kJ/mol higher than  $\text{TS}_{\text{DCC}}$ , Table S1.

**S6. Intermediates and Transition States: XCHO Loss.** The lowest energy process for loss of an aldehyde from  $\text{Li}^+\text{Ser}$  is shown in Figure 6 of the main text with the rate-limiting  $\text{TS}_{\text{APT}}$ . Two other higher energy TSs (not depicted) that also lead to  $(\text{HCHO})\text{Li}^+\text{Cay}$ ,  $\text{TS}_{\text{APT2}}$  and  $\text{TS}_{\text{APT3}}$ , were located.  $\text{TS}_{\text{APT2}}$  is almost identical to  $\text{TS}_{\text{APT}}$  except the carboxylic acid hydrogen atom is in a trans position. It is situated only 7 – 12 kJ/mol above  $\text{TS}_{\text{APT}}$ .  $\text{TS}_{\text{APT3}}$  involves a 1,4-hydrogen shift from a structure that resembles  $\text{IM}_{\text{NTC}}$ , Figure 4, except the  $\text{C}_\beta\text{O}\cdots\text{OH}$  hydrogen bond is formed on the same side as the amine group. This TS leads to a  $[\text{COOH}]$  bidentate configuration of  $(\text{HCHO})\text{Li}^+\text{Cay}$ , i.e. 1A-ZW $[\text{COOH}]$ , where A and ZW stand for aldehyde and zwitterion, respectively, Figure S1.  $\text{TS}_{\text{APT3}}$  lies 47 – 57 kJ/mol above  $\text{TS}_{\text{APT}}$ .

The complete PES for the transformation of  $(\text{XCHO})\text{Li}^+\text{Cay}$  to a slightly more stable charge-solvated complex,  $(\text{XCHO})\text{Li}^+\text{Ade}$ , including all TSs and intermediates along this pathway for the Ser case ( $\text{X} = \text{H}$ ) is presented in Figure S7. (The PES for  $\text{Li}^+\text{Thr}$  is not shown because it is similar both in energetic and structural information except that all energies relative to the ground  $\text{Li}^+\text{Thr}$  structure are about 20 kJ/mol lower than in the  $\text{Li}^+\text{Ser}$  case, Table S1.)



Relative energetics and critical geometric parameters for the TSs and intermediates are included in Tables S1 and S2, respectively. Briefly, starting from PC<sub>A</sub>, the carboxylic acid hydrogen rotates to a trans position enabling the lithium ion to move to the most stable form of (HCHO)Li<sup>+</sup>Cay, a [COOH] binding mode. The next TS, TS<sub>IPT</sub>, involves 1,4-hydrogen shift from the ammonium group to the carbonyl oxygen. Similar to the proton transfer process in TS<sub>DPT</sub>, Figure 5, this proton transfer consumes little energy because the NH...OC hydrogen bond in (HCHO)Li<sup>+</sup>Cay is relatively short (2.06 Å). After passing TS<sub>IPT</sub>, the ion falls into a stable isomer of (HCHO)Li<sup>+</sup>Ade, 1A-CS[OH,OH], where the lithium cation interacts with two hydroxyl oxygen atoms of Ade. The final rate-limiting step involves a rotation of the C–O bond along with Li<sup>+</sup>(HCHO) to bring the ion from a [OH,OH] bidentate binding to [N,OH] binding, the most stable form of (HCHO)Li<sup>+</sup>Ade. TS<sub>IR</sub> is calculated to lie 8 – 23 above TS<sub>APT</sub> for the Ser and between 11 below and 8 kJ/mol above TS<sub>APT</sub> for Thr system. Thus, this rearrangement can probably take place at the threshold for CH<sub>3</sub>CHO loss.

(XCHO)Li<sup>+</sup>Cay is calculated to lie 113 – 121 kJ/mol above its stable (XCHO)Li<sup>+</sup>Gly isomer (113 – 126 kJ/mol for X = CH<sub>3</sub>). Calculations were performed to investigate the rearrangement of (XCHO)Li<sup>+</sup>Cay to (XCHO)Li<sup>+</sup>Gly. The complete PES including all TSs and intermediates along this pathway for the Ser case (X = H) is presented in Figure S8. (Li<sup>+</sup>Thr is similar both in energetic and structural information and therefore is not shown.) Relative energetics and critical geometric parameters for the TSs and intermediates are included in Tables S1 and S2, respectively.

Similar to rearrangement of (CO<sub>2</sub>)Li<sup>+</sup>May, the first step is rate-limiting and involves direct transfer of a hydrogen atom either from the carboxylic acid or amino group to the carbon anion. The former four-centered TS, TS<sub>GPT</sub>, is lower in energy and consumes 151 – 158 kJ/mol of energy. (The latter 1,2-hydrogen shift leads to TS<sub>GPT2</sub>, which lies 1 – 15 kJ/mol higher than TS<sub>GPT</sub>.) As noted in the main text, TS<sub>GPT</sub> lies well above TS<sub>APT</sub>, indicating that this rearrangement cannot occur at the threshold for reaction 6a. After passing TS<sub>GPT</sub>, the ion falls to a zwitterionic lithiated glycine solvated by formaldehyde, IM<sub>GPT1</sub>. However, this is not the most stable form of (HCHO)Li<sup>+</sup>Gly. Transfer of a hydrogen from the amino group to the carboxylic acid terminus is needed in order to form a charge solvated conformer, IM<sub>GPT3</sub>. The energy cost is relatively small (0 – 8 kJ/mol with ZPE included and 11 – 19 kJ/mol without ZPE) because the NH...OC hydrogen bond is relatively short (1.75 Å). Further rotation of the carboxylic acid

group along the C-C bond forms the most stable [N,CO] bidentate (HCHO)Li<sup>+</sup>Gly conformation and requires 46 – 50 kJ/mol of energy to pass TS<sub>GR</sub>, Table S1.

Another reaction pathway found for eliminating XCHO and generating Li<sup>+</sup>(AA – XCHO) is the transfer of a hydrogen atom from the side-chain hydroxyl group to the carbonyl oxygen of AA, leading to a (XCHO)Li<sup>+</sup>Ade complex. The complete potential energy surface including all TSs and intermediates along this pathway for the Li<sup>+</sup>Ser case is presented in Figure S9. (Li<sup>+</sup>Thr is similar both in energetic and structural information and therefore is not shown.) Relative energetics and critical geometric parameters for the TSs and intermediates are included in Tables S1 and S2, respectively. Starting from the ground structure, M1[N,CO,OH]-cis-OH, the reactant ion passes through four TSs involving only rotations to form an intermediate leading to the rate-limiting proton transfer process. The first rotation (TS<sub>R1</sub>) involves exchanging the positions of the carboxylic oxygen atoms while maintaining tridentate binding of the lithium cation in IM<sub>R1</sub>. The second step (TS<sub>R2</sub>) involves rotation of the hydroxyl side chain away from the metal cation (similar to that in the water elimination pathway) except the lithium cation binds to Ser in a [N,OH] bidentate mode in IM<sub>R2</sub>. In the third step (TS<sub>R3</sub>), the side-chain hydroxyl rotates further in the same direction by ~120°, Table S2, to reach another [N,OH] bidentate intermediate, IM<sub>R3</sub>, lying 103 – 106 kJ/mol above the ground reactant. The fourth step (TS<sub>R4</sub>) rotates the side-chain hydroxyl hydrogen atom from a trans (in IM<sub>R3</sub>) to a cis (in IM<sub>R4</sub>) position relative to the carbonyl oxygen, which forms a long-range hydrogen bond (C<sub>β</sub>OH...O=C distance of 2.44 Å) in IM<sub>R4</sub>. In the rate-limiting step, TS<sub>RPT</sub>, the hydroxyl proton transfers to the carbonyl oxygen, which also induces cleavage of the C<sub>β</sub>–C<sub>α</sub> bond (2.43 and 2.56 Å for Ser and Thr, respectively) and formation of the formaldehyde moiety with a C<sub>β</sub>=O double bond (evident by a decrease of ~0.15 Å in the C<sub>β</sub>–O bond for both systems). It is worth noting that the C<sub>β</sub>O...H distance in TS<sub>RPT</sub>(CH<sub>3</sub>CHO) is ~0.09 Å shorter than that in TS<sub>RPT</sub>(HCHO), whereas the C<sub>β</sub>–C<sub>α</sub> bond is ~0.13 longer in TS<sub>RPT</sub>(CH<sub>3</sub>CHO). In analogy with TS<sub>APT</sub>, the shorter C<sub>β</sub>O...H bond can probably be attributed to the inductive effect of the CH<sub>3</sub> group in the Thr system stabilizing the incipient transition state, whereas the longer C<sub>β</sub>–C<sub>α</sub> distance appears to be a result of steric repulsion of the CH<sub>3</sub> group with the lithiated threonine backbone functional groups (the CH<sub>3</sub> group is cis to the C-terminus). Overall, TS<sub>RPT</sub>(CH<sub>3</sub>CHO) is lower than TS<sub>RPT</sub>(HCHO) by 10 – 15 kJ/mol, which is less than the relative energy difference (23 – 28 kJ/mol, Table S1) between TS<sub>APT</sub>(HCHO) and TS<sub>APT</sub>(CH<sub>3</sub>CHO), where the CH<sub>3</sub> group is trans relative to the C-terminus

thereby minimizing steric repulsion. Compared to the similar proton transfer process in the lowest energy water elimination pathway (where  $TS_{NPT}$  lies 91 – 108 kJ/mol above  $IM_{NTC}$ ), the proton transfer process from  $IM_{R4}$  consumes 147 – 181 kJ/mol. This is because the  $C_{\beta}OH\cdots OC$  distance in  $IM_{R4}$  is about 0.8 Å longer than the  $OH\cdots OH$  hydrogen bond distance in  $IM_{NTC}$ . After passing through  $TS_{RPT}$ , the ion falls into a product complex,  $PC_R$ , where the carbonyl oxygen of formaldehyde forms a hydrogen bond with one of the hydroxyl hydrogen atoms ( $HCHO\cdots HO$  distance of 1.69 Å) in lithiated 2-amino-1,1-dihydroxy-ethene,  $Li^+Ade$ . Alternatively, aldehyde elimination can proceed via an intermediate structure,  $IM_{R5}$  (not depicted), with the  $Li^+$  bound to the C-terminus of Ser, which is similar to  $IM_{R4}$ , Figure S9, except the Li and carboxylic H have their positions exchanged. The TS,  $TS_{RPT2}$ , involves shifting the side-chain hydroxyl hydrogen to the carbonyl group of  $IM_{R5}$ , which is slightly higher in energy (~5 kJ/mol) than  $TS_{RPT}$ , Table S1. Because of the energy release from  $TS_{RPT}$  to  $PC_R$ , it seems likely that  $PC_R$  can rearrange to form the most stable form of  $(XCHO)Li^+Ade$ , in which Ade is bound to  $Li^+$  in a  $[N,OH]$  configuration. In either case, elimination of aldehyde is calculated to be ~100 kJ/mol more favorable than the elimination of the bidentate Ade ligand.

Two possible transformations of  $(HCHO)Li^+Ade$  to  $(HCHO)Li^+Gly$  were also explored. Both pathways involve 1,3-hydrogen shifts from the hydroxyl group to the alpha carbon forming four-center TSs,  $TS_{GPT4}$  and  $TS_{GPT5}$ , and are distinguished by the lithium coordination:  $[N,OH]$  and  $[OH,OH]$ , respectively, where the latter  $(HCHO)Li^+Ade$  complex  $\equiv IM_{IPT}$ . Both TSs are situated over 140 and 50 kJ/mol above  $TS_{APT}$  and  $TS_{GPT}$ , respectively. Thus, rearrangement of the  $(HCHO)Li^+Ade$  complexes to  $(HCHO)Li^+Gly$  is not feasible.

Another possible pathway for reaction 6 is the direct transfer of a hydrogen atom from the side-chain hydroxyl group to  $C_{\alpha}$ , forming lithiated glycine and the aldehyde. Extensive searches were unable to locate such a rate-limiting TS.

## References

- (1) Moision, R. M.; Armentrout, P. B. *J. Phys. Chem. A* **2002**, *106*, 10350.
- (2) Moision, R. M.; Armentrout, P. B. *Phys. Chem. Chem. Phys.* **2004**, *6*, 2588.
- (3) Moision, R. M.; Armentrout, P. B., work in progress.
- (4) Ye, S. J.; Moision, R. M.; Armentrout, P. B. *Int. J. Mass Spectrom.* **2005**, *240*, 233.

**TABLE S1. Relative Energies (kJ/mol) of Transition States and Intermediates for Elimination of H<sub>2</sub>O, and CO<sub>2</sub>, XCHO from Lithiated Ser and Thr<sup>a</sup>**

| Name                           | Structure                                  | Theory |       |           |
|--------------------------------|--------------------------------------------|--------|-------|-----------|
|                                |                                            | B3LYP  | B3P86 | MP2(full) |
| Li <sup>+</sup> Ser<br>(rxn 4) | TS <sub>N1</sub>                           | 23.5   | 23.9  | 29.3      |
|                                | IM <sub>N1</sub> = M1[N,CO]                | 23.8   | 23.1  | 29.6      |
|                                | TS <sub>N2</sub>                           | 53.1   | 53.0  | 61.1      |
|                                | IM <sub>N2</sub>                           | 30.9   | 30.8  | 37.8      |
|                                | TS <sub>N3</sub>                           | 99.7   | 100.3 | 110.9     |
|                                | IM <sub>N3</sub>                           | 24.8   | 22.1  | 33.9      |
|                                | TS <sub>NTC</sub>                          | 76.5   | 74.4  | 89.8      |
|                                | IM <sub>NTC</sub>                          | 77.1   | 74.2  | 85.4      |
|                                | TS <sub>NPT</sub>                          | 168.5  | 173.9 | 192.9     |
|                                | TS <sub>NPT2</sub>                         | 316.0  | 327.0 | 363.1     |
|                                | PC <sub>N</sub>                            | 105.8  | 110.4 | 108.1     |
|                                | (H <sub>2</sub> O)Li <sup>+</sup> Aca[CS]  | 14.1   | 22.5  | 22.5      |
|                                | (H <sub>2</sub> O)Li <sup>+</sup> Aca[ZW]  | 38.3   | 46.7  | 47.5      |
|                                | TS <sub>Z</sub>                            | 63.8   | 62.1  | 68.9      |
|                                | IM <sub>Z</sub>                            | 42.2   | 48.1  | 56.1      |
|                                | TS <sub>ZR1</sub>                          | 85.4   | 93.5  | 101.4     |
|                                | IM <sub>ZR1</sub>                          | 35.0   | 42.8  | 43.8      |
|                                | TS <sub>ZR2</sub>                          | 67.7   | 77.1  | 77.8      |
|                                | Li <sup>+</sup> Aca[CS] + H <sub>2</sub> O | 109.6  | 114.3 | 122.8     |
|                                | Li <sup>+</sup> Aca[ZW] + H <sub>2</sub> O | 131.5  | 135.5 | 143.2     |
|                                | Li <sup>+</sup> Aca[M6] + H <sub>2</sub> O | 149.6  | 151.2 | 166.1     |
|                                | Li <sup>+</sup> (H <sub>2</sub> O) + Aca   | 222.1  | 222.9 | 231.4     |
| Li <sup>+</sup> Ser<br>(rxn 4) | TS <sub>O</sub>                            | 49.7   | 50.1  | 60.8      |
|                                | IM <sub>O</sub>                            | 50.6   | 50.1  | 60.6      |
|                                | TS <sub>OPT</sub>                          | 277.5  | 263.5 | 280.6     |
|                                | PC <sub>O</sub>                            | 121.6  | 124.6 | 129.5     |
|                                | (H <sub>2</sub> O)Li <sup>+</sup> Abl      | 49.8   | 57.9  | 63.6      |
|                                | Li <sup>+</sup> Abl + H <sub>2</sub> O     | 150.7  | 154.6 | 168.5     |
|                                | Li <sup>+</sup> (H <sub>2</sub> O) + Abl   | 211.9  | 215.3 | 228.1     |
|                                |                                            |        |       |           |
| Li <sup>+</sup> Ser<br>(rxn 4) | TS <sub>C</sub>                            | 41.9   | 41.0  | 52.2      |
|                                | IM <sub>C</sub>                            | 31.7   | 31.2  | 39.1      |
|                                | TS <sub>CPT</sub>                          | 224.2  | 218.3 | 241.2     |
|                                | PC <sub>C</sub>                            | 12.6   | 28.3  | 29.9      |
|                                | (H <sub>2</sub> O)Li <sup>+</sup> Apa      | -45.6  | -25.0 | -27.6     |
|                                | Li <sup>+</sup> Apa + H <sub>2</sub> O     | 50.0   | 66.8  | 73.0      |
|                                | Li <sup>+</sup> (H <sub>2</sub> O) + Apa   | 131.3  | 145.8 | 151.9     |
|                                |                                            |        |       |           |
| Li <sup>+</sup> Ser<br>(rxn 5) | TS <sub>DR1</sub>                          | 54.0   | 54.8  | 55.0      |
|                                | IM <sub>DR1</sub>                          | 26.0   | 25.7  | 27.1      |
|                                | TS <sub>DR2</sub>                          | 60.4   | 63.0  | 70.9      |
|                                | IM <sub>DR2</sub>                          | 40.2   | 39.3  | 50.0      |

| Name                           | Structure                                               | Theory |       |           |
|--------------------------------|---------------------------------------------------------|--------|-------|-----------|
|                                |                                                         | B3LYP  | B3P86 | MP2(full) |
| Li <sup>+</sup> Ser<br>(rxn 5) | TS <sub>DPT</sub>                                       | 66.1   | 59.5  | 75.1      |
|                                | TS <sub>DPT2</sub>                                      | 325.7  | 319.8 | 329.5     |
|                                | IM <sub>DPT</sub>                                       | 71.8   | 68.8  | 79.6      |
|                                | TS <sub>DCC</sub>                                       | 173.9  | 188.0 | 193.8     |
|                                | PC <sub>D</sub> = (CO <sub>2</sub> )Li <sup>+</sup> May | 137.0  | 163.6 | 155.6     |
|                                | (CO <sub>2</sub> )Li <sup>+</sup> Eam                   | -65.8  | -38.6 | -55.5     |
|                                | TS <sub>EPT</sub>                                       | 263.4  | 283.7 | 285.5     |
|                                | IM <sub>EPT</sub>                                       | 21.0   | 47.0  | 36.0      |
|                                | TS <sub>ER1</sub>                                       | 25.4   | 52.0  | 42.5      |
|                                | IM <sub>ER1</sub>                                       | 18.5   | 46.6  | 34.1      |
|                                | TS <sub>ER2</sub>                                       | 27.6   | 53.8  | 45.3      |
|                                | Li <sup>+</sup> May + CO <sub>2</sub>                   | 176.6  | 197.6 | 200.0     |
|                                | Li <sup>+</sup> Eam + CO <sub>2</sub>                   | -21.6  | -0.1  | -6.2      |
|                                | Li <sup>+</sup> CO <sub>2</sub> + May                   | 394.5  | 415.1 | 416.5     |
|                                | Li <sup>+</sup> CO <sub>2</sub> + Eam                   | 184.0  | 202.8 | 198.2     |
| Li <sup>+</sup> Ser<br>(rxn 6) | TS <sub>AR</sub>                                        | 35.6   | 38.2  | 43.8      |
|                                | IM <sub>AR</sub>                                        | 34.6   | 35.4  | 40.9      |
|                                | TS <sub>APT</sub>                                       | 164.0  | 174.9 | 196.8     |
|                                | TS <sub>APT2</sub>                                      | 171.8  | 187.2 | 203.8     |
|                                | TS <sub>APT3</sub>                                      | 220.7  | 222.1 | 245.7     |
|                                | PC <sub>A</sub>                                         | 118.6  | 145.4 | 161.7     |
|                                | TS <sub>AR2</sub>                                       | 125.6  | 151.0 | 166.7     |
|                                | (HCHO)Li <sup>+</sup> Cay                               | 101.6  | 127.0 | 140.1     |
|                                | TS <sub>IPT</sub>                                       | 135.3  | 153.4 | 170.1     |
|                                | IM <sub>IPT</sub>                                       | 121.6  | 147.0 | 156.2     |
|                                | TS <sub>IR</sub>                                        | 172.7  | 197.8 | 209.1     |
|                                | (HCHO)Li <sup>+</sup> Ade                               | 98.2   | 126.5 | 133.8     |
|                                | TS <sub>GPT</sub>                                       | 259.4  | 278.4 | 295.6     |
|                                | TS <sub>GPT2</sub>                                      | 260.1  | 281.8 | 310.4     |
|                                | IM <sub>GPT1</sub>                                      | 11.5   | 35.6  | 41.6      |
|                                | TS <sub>GPT3</sub>                                      | 16.6   | 36.0  | 49.2      |
|                                | IM <sub>GPT3</sub>                                      | 2.9    | 29.2  | 42.0      |
|                                | TS <sub>GR</sub>                                        | 49.0   | 78.9  | 88.5      |
|                                | (HCHO)Li <sup>+</sup> Gly                               | -14.4  | 13.7  | 18.9      |
|                                | Li <sup>+</sup> Gly + HCHO                              | 84.5   | 107.3 | 121.6     |
|                                | Li <sup>+</sup> Ade + HCHO                              | 199.3  | 221.5 | 238.1     |
|                                | Li <sup>+</sup> Cay + HCHO                              | 198.2  | 218.4 | 238.6     |
|                                | Li <sup>+</sup> HCHO + Gly                              | 179.0  | 204.6 | 215.6     |
|                                | Li <sup>+</sup> HCHO + Ade                              | 296.2  | 318.3 | 339.1     |
|                                | Li <sup>+</sup> HCHO + Cay                              | 318.4  | 336.1 | 362.0     |
| Li <sup>+</sup> Ser<br>(rxn 6) | TS <sub>R1</sub>                                        | 49.0   | 50.4  | 50.3      |
|                                | IM <sub>R1</sub> = M5[N,OH,OH]                          | 29.7   | 30.8  | 25.4      |
|                                | TS <sub>R2</sub>                                        | 82.6   | 84.3  | 86.6      |

|                                | Structure                                   | Theory |       |           |
|--------------------------------|---------------------------------------------|--------|-------|-----------|
|                                |                                             | B3LYP  | B3P86 | MP2(full) |
| Li <sup>+</sup> Ser<br>(rxn 6) | IM <sub>R2</sub>                            | 71.9   | 73.7  | 73.8      |
|                                | TS <sub>R3</sub>                            | 99.7   | 102.7 | 105.8     |
|                                | IM <sub>R3</sub>                            | 90.5   | 93.3  | 90.5      |
|                                | TS <sub>R4</sub>                            | 93.9   | 96.7  | 98.2      |
|                                | IM <sub>R4</sub>                            | 86.1   | 87.3  | 89.5      |
|                                | TS <sub>RPT</sub>                           | 233.2  | 238.0 | 270.3     |
|                                | IM <sub>R5</sub>                            | 85.1   | 79.9  | 94.7      |
|                                | TS <sub>RPT2</sub>                          | 238.2  | 242.7 | 275.4     |
|                                | PC <sub>R</sub>                             | 145.2  | 165.7 | 178.1     |
|                                | TS <sub>GPT4</sub>                          | 315.3  | 334.0 | 353.6     |
|                                | TS <sub>GPT5</sub>                          | 312.8  | 330.2 | 358.3     |
| Li <sup>+</sup> Thr<br>(rxn 4) | TS <sub>N1</sub>                            | 25.3   | 25.7  | 30.5      |
|                                | IM <sub>N1</sub> = M1[N,CO]                 | 27.2   | 24.6  | 30.9      |
|                                | TS <sub>N2</sub>                            | 64.7   | 65.3  | 71.4      |
|                                | IM <sub>N2</sub>                            | 52.5   | 52.7  | 56.9      |
|                                | TS <sub>N3</sub>                            | 104.0  | 105.3 | 113.5     |
|                                | IM <sub>N3</sub>                            | 38.8   | 36.3  | 45.2      |
|                                | TS <sub>NTC</sub>                           | 80.3   | 78.2  | 90.7      |
|                                | IM <sub>NTC</sub>                           | 77.6   | 74.2  | 83.5      |
|                                | TS <sub>NPT</sub>                           | 160.7  | 168.8 | 190.4     |
|                                | TS <sub>NPT2</sub>                          | 292.0  | 304.6 | 342.7     |
|                                | PC <sub>N</sub>                             | 98.0   | 102.5 | 102.2     |
|                                | (H <sub>2</sub> O)Li <sup>+</sup> Amca[CS]  | 13.5   | 22.3  | 22.9      |
|                                | (H <sub>2</sub> O)Li <sup>+</sup> Amca[ZW]  | 32.2   | 41.3  | 44.4      |
|                                | TS <sub>Z</sub>                             | 61.2   | 61.3  | 69.0      |
|                                | IM <sub>Z</sub>                             | 43.0   | 49.5  | 58.8      |
|                                | TS <sub>ZR1</sub>                           | 87.2   | 96.8  | 105.3     |
|                                | IM <sub>ZR1</sub>                           | 33.6   | 42.2  | 43.4      |
|                                | TS <sub>ZR2</sub>                           | 66.2   | 76.0  | 77.1      |
|                                | Li <sup>+</sup> Amca[CS] + H <sub>2</sub> O | 107.5  | 111.5 | 122.4     |
|                                | Li <sup>+</sup> Amca[ZW] + H <sub>2</sub> O | 123.7  | 128.1 | 139.3     |
|                                | Li <sup>+</sup> Amca[M6] + H <sub>2</sub> O | 149.5  | 151.1 | 168.2     |
|                                | Li <sup>+</sup> (H <sub>2</sub> O) + Amca   | 226.4  | 227.1 | 237.0     |
| Li <sup>+</sup> Thr<br>(rxn 4) | TS <sub>O</sub>                             | 55.9   | 56.4  | 64.4      |
|                                | IM <sub>O</sub>                             | 54.4   | 53.8  | 61.4      |
|                                | TS <sub>OPT</sub>                           | 272.9  | 259.4 | 275.0     |
|                                | PC <sub>O</sub>                             | 110.3  | 115.2 | 120.4     |
|                                | (H <sub>2</sub> O)Li <sup>+</sup> Ambl      | 39.4   | 48.6  | 54.2      |
|                                | Li <sup>+</sup> Ambl + H <sub>2</sub> O     | 138.7  | 142.8 | 157.9     |
|                                | Li <sup>+</sup> (H <sub>2</sub> O) + Ambl   | 211.2  | 214.6 | 227.4     |
| Li <sup>+</sup> Thr<br>(rxn 4) | TS <sub>C</sub>                             | 41.0   | 39.6  | 50.3      |
|                                | IM <sub>C</sub>                             | 36.1   | 34.3  | 41.5      |
|                                | TS <sub>CPT</sub>                           | 231.6  | 225.2 | 250.2     |

|                                | Structure                                               | Theory                    |                           |                           |
|--------------------------------|---------------------------------------------------------|---------------------------|---------------------------|---------------------------|
|                                |                                                         | B3LYP                     | B3P86                     | MP2(full)                 |
| Li <sup>+</sup> Thr<br>(rxn 4) | TS <sub>CPT2</sub>                                      | 228.7                     | 237.4                     | 261.7                     |
|                                | PC <sub>C</sub>                                         | 14.8                      | 29.4                      | 40.6                      |
|                                | (H <sub>2</sub> O)Li <sup>+</sup> (trans-Aba)           | -56.3 (0.0) <sup>b</sup>  | -36.7 (0.0) <sup>b</sup>  | -30.0 (0.0) <sup>b</sup>  |
|                                | (H <sub>2</sub> O)Li <sup>+</sup> (cis-Aba)             | -43.4 (12.9) <sup>b</sup> | -22.7 (13.0) <sup>b</sup> | -16.7 (13.3) <sup>b</sup> |
|                                | (H <sub>2</sub> O)Li <sup>+</sup> (3-Aba)               | -11.0 (45.3) <sup>b</sup> | 9.8 (46.5) <sup>b</sup>   | 4.2 (34.2) <sup>b</sup>   |
|                                | Li <sup>+</sup> (trans-Aba) + H <sub>2</sub> O          | 36.9 (0.0) <sup>b</sup>   | 52.7 (0.0) <sup>b</sup>   | 68.5 (0.0) <sup>b</sup>   |
|                                | Li <sup>+</sup> (cis-Aba) + H <sub>2</sub> O            | 49.7 (12.8) <sup>b</sup>  | 65.8 (13.1) <sup>b</sup>  | 82.1 (13.6) <sup>b</sup>  |
|                                | Li <sup>+</sup> (3-Aba) + H <sub>2</sub> O              | 83.5 (46.6) <sup>b</sup>  | 100.5 (47.9) <sup>b</sup> | 103.8 (35.3) <sup>b</sup> |
| Li <sup>+</sup> Thr<br>(rxn 5) | Li <sup>+</sup> (H <sub>2</sub> O) + trans-Aba          | 136.9                     | 150.7                     | 161.5                     |
|                                | TS <sub>DCC</sub>                                       | 180.2                     | 194.5                     | 197.6                     |
|                                | PC <sub>D</sub> = (CO <sub>2</sub> )Li <sup>+</sup> Eay | 144.9                     | 170.6                     | 162.5                     |
|                                | TS <sub>EPT</sub>                                       | 266.1                     | 287.6                     | 287.8                     |
|                                | (CO <sub>2</sub> )Li <sup>+</sup> Pam                   | -63.3                     | -38.3                     | -52.7                     |
|                                | Li <sup>+</sup> Pam + CO <sub>2</sub>                   | -20.5                     | 0.5                       | -3.9                      |
|                                | Li <sup>+</sup> Eay + CO <sub>2</sub>                   | 183.4                     | 203.6                     | 206.2                     |
|                                | Li <sup>+</sup> CO <sub>2</sub> + Pam                   | 162.2                     | 180.8                     | 176.7                     |
| Li <sup>+</sup> Thr<br>(rxn 6) | Li <sup>+</sup> CO <sub>2</sub> + Eay                   | 409.3                     | 429.2                     | 429.9                     |
|                                | TS <sub>AR</sub>                                        | 35.3                      | 38.4                      | 42.8                      |
|                                | IM <sub>AR</sub>                                        | 34.4                      | 34.9                      | 40.1                      |
|                                | TS <sub>APT</sub>                                       | 138.6                     | 146.5                     | 173.4                     |
|                                | PC <sub>A</sub>                                         | 76.8                      | 104.9                     | 136.2                     |
|                                | TS <sub>AR2</sub>                                       | 83.5                      | 109.8                     | 141.4                     |
|                                | (CH <sub>3</sub> CHO)Li <sup>+</sup> Cay                | 61.1                      | 87.5                      | 115.7                     |
|                                | TS <sub>IPT</sub>                                       | 92.9                      | 111.1                     | 144.2                     |
|                                | IM <sub>IPT</sub>                                       | 78.1                      | 104.3                     | 129.6                     |
|                                | TS <sub>IR</sub>                                        | 127.8                     | 153.3                     | 181.2                     |
|                                | TS <sub>GPT</sub>                                       | 217.9                     | 238.9                     | 270.7                     |
|                                | TS <sub>RPT</sub>                                       | 215.8                     | 223.5                     | 260.3                     |
|                                | (CH <sub>3</sub> CHO)Li <sup>+</sup> Gly                | -55.5                     | -24.7                     | -6.4                      |
|                                | (CH <sub>3</sub> CHO)Li <sup>+</sup> Ade                | 56.4                      | 86.1                      | 108.3                     |
|                                | Li <sup>+</sup> Gly + CH <sub>3</sub> CHO               | 61.6                      | 85.1                      | 113.0                     |
|                                | Li <sup>+</sup> Ade + CH <sub>3</sub> CHO               | 176.5                     | 199.3                     | 229.6                     |
|                                | Li <sup>+</sup> Cay + CH <sub>3</sub> CHO               | 175.4                     | 196.2                     | 230.0                     |
|                                | Li <sup>+</sup> CH <sub>3</sub> CHO + Gly               | 129.0                     | 154.2                     | 183.9                     |
|                                | Li <sup>+</sup> CH <sub>3</sub> CHO + Ade               | 220.0                     | 240.2                     | 279.7                     |
|                                | Li <sup>+</sup> CH <sub>3</sub> CHO + Cay               | 268.3                     | 285.8                     | 330.4                     |

<sup>a</sup> Structures are optimized at the B3LYP/6-311+G(d,p) level and zero point energies calculated at this level are included in all values. Single point energies are calculated using the indicated level of theory and the 6-311+G(2d,2p) basis set. <sup>b</sup> Value in parenthesis is the energy relative to the trans-Aba form.

**Table S2. Geometric Parameters of Transition State and Intermediate Structures Optimized at B3LYP/6-311+G(d,p) Level of Theory**

|                                | Species                                   | r(Li <sup>+</sup> -OC) (Å) | r(Li <sup>+</sup> -N) (Å) | r(Li <sup>+</sup> -OH) (Å)              | ∠Li <sup>+</sup> OC (°) | ∠Li <sup>+</sup> OCC <sub>α</sub> (°) | ∠NC <sub>α</sub> CO(°) |
|--------------------------------|-------------------------------------------|----------------------------|---------------------------|-----------------------------------------|-------------------------|---------------------------------------|------------------------|
| Li <sup>+</sup> Ser<br>(rxn 4) | Li <sup>+</sup> Ser                       | 1.968                      | 2.091                     | 1.975                                   | 103.8                   | 11.6                                  | 32.8                   |
|                                | TS <sub>N1</sub>                          | 1.856                      | 2.039                     | -                                       | 112.7                   | 3.1                                   | 5.7                    |
|                                | IM <sub>N1</sub>                          | 1.857                      | 2.033                     | -                                       | 113.6                   | 0.7                                   | 7.9                    |
|                                | TS <sub>N2</sub>                          | 1.855                      | 2.065                     | -                                       | 113.1                   | 6.5                                   | 25.0                   |
|                                | IM <sub>N2</sub>                          | 1.856                      | 2.061                     | -                                       | 112.8                   | 13.5                                  | 29.0                   |
|                                | TS <sub>N3</sub>                          | 1.867                      | 2.051                     | -                                       | 114.4                   | 9.9                                   | 26.1                   |
|                                | IM <sub>N3</sub>                          | 1.828                      | 2.079                     | -                                       | 116.5                   | 1.4                                   | 16.3                   |
|                                | TS <sub>NTC</sub>                         | 1.726                      | 3.828                     | -                                       | 180.0                   | 127.2                                 | 17.4                   |
|                                | IM <sub>NTC</sub>                         | 1.919                      | -                         | 2.061 <sup>a</sup>                      | 94.1                    | 176.7                                 | 19.1                   |
|                                | TS <sub>NPT</sub>                         | 1.940                      | -                         | 1.955 <sup>a</sup>                      | 84.1                    | 175.8                                 | 24.8                   |
|                                | TS <sub>NPT2</sub>                        | 1.905                      | 1.944                     | -                                       | 110.4                   | 5.1                                   | 9.0                    |
|                                | PC <sub>N</sub>                           | 1.952                      | -                         | 1.949 <sup>a</sup>                      | 82.9                    | 179.2                                 | 7.5                    |
|                                | (H <sub>2</sub> O)Li <sup>+</sup> Aca[CS] | 1.930                      | 2.069                     | 1.894 <sup>b</sup>                      | 113.6                   | 9.5                                   | 5.8                    |
|                                | (H <sub>2</sub> O)Li <sup>+</sup> Aca[ZW] | 1.977                      | -                         | 2.022 <sup>a</sup> , 1.896 <sup>b</sup> | 84.4                    | 179.2                                 | 169.0                  |
|                                | TS <sub>Z</sub>                           | 1.962                      | -                         | 2.113 <sup>a</sup> , 1.884 <sup>b</sup> | 81.3                    | 179.3                                 | 176.3                  |
|                                | IM <sub>Z</sub>                           | 1.794                      | -                         | 1.883 <sup>b</sup>                      | 153.3                   | 178.7                                 | 176.5                  |
|                                | TS <sub>ZR1</sub>                         | 1.789                      | -                         | 1.882 <sup>b</sup>                      | 163.6                   | 153.2                                 | 73.5                   |
|                                | IM <sub>ZR1</sub>                         | 1.909                      | 2.087                     | 1.892 <sup>b</sup>                      | 115.8                   | 8.1                                   | 3.9                    |
|                                | TS <sub>ZR2</sub>                         | 1.938                      | 2.068                     | 1.892 <sup>b</sup>                      | 114.8                   | 6.2                                   | 3.0                    |
|                                | Li <sup>+</sup> Aca[CS]                   | 1.887                      | 2.028                     | -                                       | 113.1                   | 9.0                                   | 5.2                    |
|                                | Li <sup>+</sup> Aca[ZW]                   | 1.940                      | -                         | 1.975 <sup>a</sup>                      | 83.9                    | 179.0                                 | 168.8                  |
|                                | Li <sup>+</sup> Aca[M6]                   | 1.755                      | -                         | -                                       | 156.7                   | 178.8                                 | 176.5                  |
| Li <sup>+</sup> Ser<br>(rxn 4) | TS <sub>O</sub>                           | 1.858                      | 2.046                     | -                                       | 113.9                   | 2.7                                   | 18.2                   |
|                                | IM <sub>O</sub>                           | 1.864                      | 2.047                     | -                                       | 113.6                   | 1.2                                   | 15.3                   |
|                                | TS <sub>OPT</sub>                         | 1.838                      | 2.103                     | -                                       | 110.8                   | 5.6                                   | 9.3                    |
|                                | PC <sub>O</sub>                           | 1.915                      | 2.168                     | -                                       | 100.8                   | 14.9                                  | 38.1                   |
|                                | (H <sub>2</sub> O)Li <sup>+</sup> Abl     | 1.968                      | 2.249                     | 1.882 <sup>b</sup>                      | 102.4                   | 15.0                                  | 38.6                   |
|                                | Li <sup>+</sup> Abl                       | 1.920                      | 2.189                     | -                                       | 101.9                   | 15.1                                  | 37.6                   |



| Species                        |                                            | r(Li <sup>+</sup> –OC) (Å) | r(Li <sup>+</sup> –N) (Å) | r(Li <sup>+</sup> –OH) (Å)             | ∠Li <sup>+</sup> OC (°) | ∠Li <sup>+</sup> OCC <sub>α</sub> (°) | ∠NC <sub>α</sub> CO(°)   |
|--------------------------------|--------------------------------------------|----------------------------|---------------------------|----------------------------------------|-------------------------|---------------------------------------|--------------------------|
| Li <sup>+</sup> Ser<br>(rxn 4) | TS <sub>C</sub>                            | 1.869                      | 2.027                     | -                                      | 112.7                   | 3.1                                   | 9.3, 5.2 <sup>f</sup>    |
|                                | IM <sub>C</sub>                            | 1.873                      | 2.030                     | -                                      | 112.9                   | 1.5                                   | 12.8, 51.6 <sup>f</sup>  |
|                                | TS <sub>CPT</sub>                          | 1.828                      | 2.058                     | -                                      | 111.1                   | 3.2                                   | 14.0, 105.9 <sup>f</sup> |
|                                | PC <sub>C</sub>                            | 1.860                      | 2.035                     | -                                      | 112.2                   | 4.2                                   | 10.7                     |
|                                | (H <sub>2</sub> O)Li <sup>+</sup> Apa      | 1.900                      | 2.110                     | 1.894 <sup>b</sup>                     | 114.1                   | 6.4                                   | 10.7                     |
|                                | Li <sup>+</sup> Apa                        | 1.845                      | 2.060                     | -                                      | 113.8                   | 3.8                                   | 8.4                      |
| Li <sup>+</sup> Thr<br>(rxn 4) | Li <sup>+</sup> Thr                        | 1.968                      | 2.083                     | 1.961                                  | 103.3                   | 11.9                                  | 32.6                     |
|                                | TS <sub>N1</sub>                           | 1.854                      | 2.034                     | -                                      | 112.5                   | 2.5                                   | 6.3                      |
|                                | IM <sub>N1</sub>                           | 1.853                      | 2.030                     | -                                      | 113.6                   | 0.2                                   | 6.7                      |
|                                | TS <sub>N2</sub>                           | 1.853                      | 2.053                     | -                                      | 112.5                   | 9.9                                   | 28.7                     |
|                                | IM <sub>N2</sub>                           | 1.856                      | 2.050                     | -                                      | 112.6                   | 9.6                                   | 27.0                     |
|                                | TS <sub>N3</sub>                           | 1.861                      | 2.042                     | -                                      | 115.0                   | 5.4                                   | 19.6                     |
|                                | IM <sub>N3</sub>                           | 1.828                      | 2.071                     | -                                      | 116.1                   | 1.8                                   | 12.8                     |
|                                | TS <sub>NTC</sub>                          | 1.725                      | 3.817                     | -                                      | 180.0                   | 133.2                                 | 12.7                     |
|                                | IM <sub>NTC</sub>                          | 1.921                      | -                         | 2.049 <sup>a</sup>                     | 93.6                    | 176.2                                 | 14.2                     |
|                                | TS <sub>NPT</sub>                          | 1.947                      | -                         | 1.937 <sup>a</sup>                     | 84.0                    | 175.0                                 | 15.5                     |
|                                | TS <sub>NPT2</sub>                         | 1.905                      | 1.926                     | -                                      | 109.7                   | 6.0                                   | 10.5                     |
|                                | PC <sub>N</sub>                            | 1.912                      | -                         | 1.958 <sup>a</sup>                     | 83.9                    | 179.4                                 | 178.3                    |
|                                | (H <sub>2</sub> O)Li <sup>+</sup> Amca[CS] | 1.930                      | 2.069                     | 1.896 <sup>b</sup>                     | 113.6                   | 9.5                                   | 5.8                      |
|                                | (H <sub>2</sub> O)Li <sup>+</sup> Amca[ZW] | 1.970                      | -                         | 2.014, <sup>a</sup> 1.896 <sup>b</sup> | 84.4                    | 178.8                                 | 174.1                    |
|                                | TS <sub>Z</sub>                            | 1.959                      | -                         | 2.104, <sup>a</sup> 1.885 <sup>b</sup> | 89.9                    | 177.7                                 | 177.6                    |
|                                | IM <sub>Z</sub>                            | 1.791                      | -                         | 1.884 <sup>b</sup>                     | 152.9                   | 177.5                                 | 178.5                    |
|                                | TS <sub>ZR1</sub>                          | 1.787                      | -                         | 1.883 <sup>b</sup>                     | 162.0                   | 163.1                                 | 79.8                     |
|                                | IM <sub>ZR1</sub>                          | 1.909                      | 2.082                     | 1.893 <sup>b</sup>                     | 114.9                   | 4.6                                   | 0.5                      |
|                                | TS <sub>ZR2</sub>                          | 1.937                      | 2.063                     | 1.894 <sup>b</sup>                     | 113.9                   | 3.5                                   | 0.6                      |
|                                | Li <sup>+</sup> Amca[CS]                   | 1.886                      | 2.022                     | -                                      | 112.3                   | 4.9                                   | 2.1                      |
|                                | Li <sup>+</sup> Amca[ZW]                   | 1.932                      | -                         | 1.970 <sup>a</sup>                     | 83.9                    | 178.3                                 | 174.1                    |
|                                | Li <sup>+</sup> Amca[M6]                   | 1.751                      | -                         | -                                      | 155.8                   | 177.3                                 | 178.1                    |

|                                | Species                                                 | r(Li <sup>+</sup> –OC) (Å) | r(Li <sup>+</sup> –N) (Å) | r(Li <sup>+</sup> –OH) (Å) | ∠Li <sup>+</sup> OC (°) | ∠Li <sup>+</sup> OCC <sub>α</sub> (°) | ∠NC <sub>α</sub> CO(°)   |
|--------------------------------|---------------------------------------------------------|----------------------------|---------------------------|----------------------------|-------------------------|---------------------------------------|--------------------------|
| Li <sup>+</sup> Thr<br>(rxn 4) | TS <sub>O</sub>                                         | 1.856                      | 2.040                     | -                          | 113.9                   | 4.7                                   | 22.2                     |
|                                | IM <sub>O</sub>                                         | 1.864                      | 2.047                     | -                          | 113.6                   | 1.2                                   | 15.3                     |
|                                | TS <sub>OPT</sub>                                       | 1.832                      | 2.095                     | -                          | 110.5                   | 1.9                                   | 8.9                      |
|                                | PC <sub>O</sub>                                         | 1.908                      | 2.159                     | -                          | 100.6                   | 14.7                                  | 38.1                     |
|                                | (H <sub>2</sub> O)Li <sup>+</sup> Ambl                  | 1.959                      | 2.243                     | 1.884 <sup>b</sup>         | 102.3                   | 14.9                                  | 38.6                     |
|                                | Li <sup>+</sup> Ambl                                    | 1.913                      | 2.180                     | -                          | 101.7                   | 15.1                                  | 37.8                     |
| Li <sup>+</sup> Thr<br>(rxn 4) | TS <sub>C</sub>                                         | 1.867                      | 2.024                     | -                          | 112.6                   | 3.9                                   | 10.7, 3.2 <sup>c</sup>   |
|                                | IM <sub>C</sub>                                         | 1.874                      | 2.023                     | -                          | 112.6                   | 7.1                                   | 21.5, 45.8 <sup>c</sup>  |
|                                | TS <sub>CPT</sub>                                       | 1.821                      | 2.146                     | -                          | 111.6                   | 1.6                                   | 11.2, 112.0 <sup>c</sup> |
|                                | TS <sub>CPT2</sub>                                      | 2.032                      | 2.049                     | 1.856                      | 103.1                   | 24.3                                  | 19.9, 57.7 <sup>c</sup>  |
|                                | PC <sub>C</sub>                                         | 1.846                      | 2.018                     | -                          | 112.9                   | 2.0                                   | 10.7                     |
|                                | (H <sub>2</sub> O)Li <sup>+</sup> (trans-Aba)           | 1.879                      | 2.094                     | 1.898 <sup>b</sup>         | 114.5                   | 0.0                                   | 0.0                      |
|                                | Li <sup>+</sup> (trans-Aba)                             | 1.838                      | 2.057                     | -                          | 113.8                   | 0.0                                   | 0.0                      |
|                                | (H <sub>2</sub> O)Li <sup>+</sup> (cis-Aba)             | 1.884                      | 2.088                     | 1.898 <sup>b</sup>         | 114.8                   | 3.7                                   | 10.9                     |
|                                | Li <sup>+</sup> (cis-Aba)                               | 1.840                      | 2.046                     | -                          | 114.4                   | 1.7                                   | 7.9                      |
|                                | (H <sub>2</sub> O)Li <sup>+</sup> (3-Aba)               | 1.910                      | 2.087                     | 1.896 <sup>b</sup>         | 113.3                   | 1.2                                   | 19.6                     |
|                                | Li <sup>+</sup> (3-Aba)                                 | 1.838                      | 2.057                     | -                          | 112.6                   | 2.1                                   | 20.0                     |
| Li <sup>+</sup> Ser<br>(rxn 5) | TS <sub>DR1</sub>                                       | 1.984                      | 2.082                     | 1.977                      | 104.1                   | 15.3                                  | 28.9                     |
|                                | IM <sub>DR1</sub>                                       | 1.940                      | 2.101                     | 1.965                      | 105.7                   | 10.6                                  | 34.3                     |
|                                | TS <sub>DR2</sub>                                       | 1.819                      | -                         | 1.905                      | 127.2                   | 1.6                                   | 79.5                     |
|                                | IM <sub>DR2</sub>                                       | 1.823                      | -                         | 1.922                      | 122.3                   | 52.6                                  | 151.9                    |
|                                | TS <sub>DPT</sub>                                       | 1.788                      | -                         | 1.974                      | 117.5                   | 66.5                                  | 164.7                    |
|                                | TS <sub>DPT2</sub>                                      | 1.994                      | 2.100                     | 1.930                      | 111.3                   | 9.2                                   | 36.6                     |
|                                | IM <sub>DPT</sub>                                       | 1.774                      | -                         | 1.993                      | 118.2                   | 68.6                                  | 161.0                    |
|                                | TS <sub>DCC</sub>                                       | 1.883                      | 2.491 <sup>d</sup>        | 1.855                      | 105.0                   | 17.1                                  | 145.3                    |
|                                | PC <sub>D</sub> = (CO <sub>2</sub> )Li <sup>+</sup> May | 1.955                      | 2.148 <sup>d</sup>        | 1.909                      | 178.7                   | 93.5 <sup>e</sup>                     | 102.4 <sup>f</sup>       |
|                                | (CO <sub>2</sub> )Li <sup>+</sup> Eam                   | 1.944                      | 2.039                     | 1.891                      | 179.4                   | 30.9 <sup>e</sup>                     | 30.9 <sup>f</sup>        |

| Species                        |                           | r(Li <sup>+</sup> –OC) (Å) | r(Li <sup>+</sup> –N) (Å) | r(Li <sup>+</sup> –OH) (Å)             | ∠Li <sup>+</sup> OC (°) | ∠Li <sup>+</sup> OCC <sub>α</sub> (°) | ∠NC <sub>α</sub> CO (°) |
|--------------------------------|---------------------------|----------------------------|---------------------------|----------------------------------------|-------------------------|---------------------------------------|-------------------------|
|                                | TS <sub>EPT</sub>         | 1.934                      | 2.282 <sup>d</sup>        | 1.873                                  | 178.7                   | 95.1 <sup>e</sup>                     | 102.9 <sup>f</sup>      |
|                                | IM <sub>EPT</sub>         | 1.900                      | 2.950 <sup>d</sup>        | 1.840                                  | 179.7                   | 1.4 <sup>e</sup>                      | 179.3 <sup>f</sup>      |
|                                | TS <sub>ER1</sub>         | 1.902                      | 2.988 <sup>d</sup>        | 1.834                                  | 179.7                   | 0.1 <sup>e</sup>                      | 180.0 <sup>f</sup>      |
|                                | IM <sub>ER1</sub>         | 1.902                      | 2.976 <sup>d</sup>        | 1.834                                  | 179.3                   | 13.7 <sup>e</sup>                     | 173.9 <sup>f</sup>      |
|                                | TS <sub>ER2</sub>         | 1.900                      | -                         | 1.833                                  | 179.6                   | 102.6 <sup>e</sup>                    | 127.9 <sup>f</sup>      |
|                                | Li <sup>+</sup> May       | -                          | 2.118 <sup>d</sup>        | 1.871                                  | -                       | 17.7 <sup>e</sup>                     | 106.5 <sup>f</sup>      |
|                                | Li <sup>+</sup> Eam       | -                          | 2.011                     | 1.863                                  | -                       | 30.5 <sup>e</sup>                     | 50.3 <sup>f</sup>       |
| Li <sup>+</sup> Ser<br>(rxn 6) | TS <sub>AR</sub>          | 1.848                      | 3.528                     | 1.877                                  | 124.9                   | 6.8                                   | 85.5                    |
|                                | IM <sub>AR</sub>          | 1.869                      | -                         | 1.887                                  | 125.7                   | 19.4                                  | 105.6                   |
|                                | TS <sub>APT</sub>         | 1.871                      | -                         | 1.830                                  | 121.0                   | 77.1                                  | 23.7                    |
|                                | TS <sub>APT2</sub>        | 1.811                      | -                         | 1.904                                  | 124.6                   | 88.9                                  | 14.9                    |
|                                | TS <sub>APT3</sub>        | 1.873                      | -                         | 2.054 <sup>a</sup>                     | 94.7                    | 174.3                                 | 154.6                   |
|                                | PC <sub>A</sub>           | 1.741                      | -                         | 1.853 <sup>g</sup>                     | 157.1                   | 179.5                                 | 0.0                     |
|                                | TS <sub>AR2</sub>         | 1.784                      | -                         | 1.857 <sup>g</sup>                     | 127.7                   | 162.6                                 | 0.7                     |
|                                | (HCHO)Li <sup>+</sup> Cay | 1.874                      | -                         | 2.124, <sup>a</sup> 1.863 <sup>g</sup> | 97.9                    | 179.7                                 | 0.0                     |
|                                | TS <sub>IPT</sub>         | 1.888                      | -                         | 2.184, <sup>a</sup> 1.850 <sup>g</sup> | 98.9                    | 180.0                                 | 180.0                   |
|                                | IM <sub>IPT</sub>         | 1.951 <sup>k</sup>         | -                         | 2.041, <sup>k</sup> 1.842 <sup>g</sup> | 98.9 <sup>h</sup>       | 180.0 <sup>i</sup>                    | 0.0 <sup>j</sup>        |
|                                | TS <sub>IR</sub>          | 1.900 <sup>k</sup>         | 3.224                     | 3.429, <sup>k</sup> 1.833 <sup>g</sup> | 107.9 <sup>h</sup>      | 74.1 <sup>i</sup>                     | 0.2 <sup>j</sup>        |
|                                | (HCHO)Li <sup>+</sup> Ade | -                          | 2.049                     | 1.943, <sup>k</sup> 1.861 <sup>g</sup> | 110.3 <sup>h</sup>      | 0.0 <sup>i</sup>                      | 180.0 <sup>j</sup>      |
|                                | TS <sub>GPT</sub>         | 2.006                      | -                         | 2.045, <sup>a</sup> 1.853 <sup>g</sup> | 86.8                    | 176.6                                 | 24.7                    |
|                                | TS <sub>GPT2</sub>        | 1.803                      | -                         | 3.086, <sup>a</sup> 1.849 <sup>g</sup> | 133.1                   | 175.8                                 | 4.5                     |
|                                | IM <sub>GPT1</sub>        | 1.964, 2.052               | -                         | 1.861 <sup>g</sup>                     | 81.5                    | 180.0                                 | 0.0                     |
|                                | TS <sub>GPT3</sub>        | 1.948, 2.158               | -                         | 1.850 <sup>g</sup>                     | 91.3                    | 180.0                                 | 180.0                   |
|                                | IM <sub>GPT3</sub>        | 1.793                      | -                         | 1.843 <sup>g</sup>                     | 153.4                   | 180.0                                 | 180.0                   |
|                                | TS <sub>GR</sub>          | 1.806                      | -                         | 1.840 <sup>g</sup>                     | 151.4                   | 171.4                                 | 65.9                    |
|                                | (HCHO)Li <sup>+</sup> Gly | 1.905                      | -                         | 2.104, <sup>a</sup> 1.862 <sup>g</sup> | 114.6                   | 0.2                                   | 6.8                     |
|                                | Li <sup>+</sup> Gly       | 1.860                      | 2.063                     | -                                      | 113.9                   | 0.2                                   | 5.1                     |
|                                | Li <sup>+</sup> Ade       | -                          | 2.009                     | 1.896 <sup>a</sup>                     | 109.3 <sup>h</sup>      | 0.0 <sup>i</sup>                      | 180.0 <sup>j</sup>      |
|                                | Li <sup>+</sup> Cay       | 1.843                      | -                         | 2.033                                  | 95.8                    | 180.0                                 | 0.0                     |
|                                | Li <sup>+</sup> (HCHO)    | 1.793                      | -                         | -                                      | 180.0                   | -                                     | -                       |

| Species                        |                                          | $r(\text{Li}^+-\text{OC})$ (Å) | $r(\text{Li}^+-\text{N})$ (Å) | $r(\text{Li}^+-\text{OH})$ (Å)         | $\angle\text{Li}^+\text{OC}$ (°) | $\angle\text{Li}^+\text{OCC}_\alpha$ (°) | $\angle\text{NC}_\alpha\text{CO}$ (°) |
|--------------------------------|------------------------------------------|--------------------------------|-------------------------------|----------------------------------------|----------------------------------|------------------------------------------|---------------------------------------|
| Li <sup>+</sup> Ser<br>(rxn 6) | TS <sub>R1</sub>                         | 3.211                          | 2.034                         | 1.857                                  | 113.2 <sup>h</sup>               | 15.3 <sup>i</sup>                        | 100.6, 43.7 <sup>c</sup>              |
|                                | IM <sub>R1</sub>                         | 2.018a                         | 2.051                         | 1.941                                  | 106.3 <sup>h</sup>               | 14.6 <sup>i</sup>                        | 150.4, 52.0 <sup>c</sup>              |
|                                | TS <sub>R2</sub>                         | -                              | 1.987                         | 1.901 <sup>a</sup>                     | 114.7 <sup>h</sup>               | 10.0 <sup>i</sup>                        | 156.1, 5.9 <sup>c</sup>               |
|                                | IM <sub>R2</sub>                         | -                              | 1.987                         | 1.900 <sup>a</sup>                     | 115.6 <sup>h</sup>               | 5.1 <sup>i</sup>                         | 162.6, 50.9 <sup>c</sup>              |
|                                | TS <sub>R3</sub>                         | -                              | 2.003                         | 1.887 <sup>a</sup>                     | 115.8 <sup>h</sup>               | 10.6 <sup>i</sup>                        | 156.0, 127.3 <sup>c</sup>             |
|                                | IM <sub>R3</sub>                         | -                              | 2.016                         | 1.886 <sup>a</sup>                     | 113.7 <sup>h</sup>               | 22.2 <sup>i</sup>                        | 141.0, 168.5 <sup>c</sup>             |
|                                | TS <sub>R4</sub>                         | -                              | 2.004                         | 1.881 <sup>a</sup>                     | 115.8 <sup>h</sup>               | 12.3 <sup>i</sup>                        | 156.8, 164.9 <sup>c</sup>             |
|                                | IM <sub>R4</sub>                         | -                              | 2.008                         | 1.898 <sup>a</sup>                     | 114.8 <sup>h</sup>               | 13.4 <sup>i</sup>                        | 149.9, 164.1 <sup>c</sup>             |
|                                | TS <sub>RPT</sub>                        | -                              | 2.001                         | 1.877 <sup>a</sup>                     | 112.0 <sup>h</sup>               | 6.1 <sup>i</sup>                         | 178.2, 179.5 <sup>c</sup>             |
|                                | IM <sub>R5</sub>                         | 1.915                          | -                             | 2.133 <sup>a</sup>                     | 94.9                             | 178.1                                    | 170.7                                 |
|                                | TS <sub>RPT2</sub>                       | 1.901                          | -                             | 1.972 <sup>a</sup>                     | 92.3                             | 174.5                                    | 178.3                                 |
|                                | PC <sub>R</sub>                          | -                              | 1.998                         | 1.876                                  | 109.2 <sup>h</sup>               | 0.0 <sup>i</sup>                         | 180.0 <sup>j</sup>                    |
| Li <sup>+</sup> Thr<br>(rxn 6) | TS <sub>AR</sub>                         | 1.848                          | 3.422                         | 1.876                                  | 123.9                            | 0.3                                      | 77.8                                  |
|                                | IM <sub>AR</sub>                         | 1.870                          |                               | 1.876                                  | 125.1                            | 17.7                                     | 103.5                                 |
|                                | TS <sub>APT</sub>                        | 1.853                          | -                             | 1.867 <sup>c</sup>                     | 122.0                            | 59.5                                     | 22.0                                  |
|                                | PC <sub>A</sub>                          | 1.748                          | -                             | 1.828 <sup>c</sup>                     | 157.0                            | 179.7                                    | 0.0                                   |
|                                | TS <sub>AR2</sub>                        | 1.791                          | -                             | 3.053, <sup>a</sup> 1.833 <sup>g</sup> | 127.4                            | 162.9                                    | 0.6                                   |
|                                | (CH <sub>3</sub> CHO)Li <sup>+</sup> Cay | 1.878                          | -                             | 2.617, <sup>a</sup> 1.838 <sup>g</sup> | 98.5                             | 180.0                                    | 0.0                                   |
|                                | TS <sub>IPT</sub>                        | 1.891                          | -                             | 2.220, <sup>k</sup> 1.824 <sup>g</sup> | 99.9                             | 180.0                                    | 0.0                                   |
|                                | IM <sub>IPT</sub>                        | 1.963 <sup>k</sup>             | -                             | 2.049, <sup>k</sup> 1.818 <sup>g</sup> | 99.9 <sup>h</sup>                | 180.0 <sup>i</sup>                       | 0.0 <sup>j</sup>                      |
|                                | TS <sub>IR</sub>                         | 1.908 <sup>a</sup>             | 3.202                         | 3.447, <sup>a</sup> 1.807 <sup>g</sup> | 107.8 <sup>h</sup>               | 73.1 <sup>i</sup>                        | 0.3 <sup>j</sup>                      |
|                                | TS <sub>GPT</sub>                        | 2.015                          |                               | 2.057, <sup>a</sup> 1.827 <sup>g</sup> | 87.0                             | 176.6                                    | 150.4                                 |
|                                | (CH <sub>3</sub> CHO)Li <sup>+</sup> Ade | 1.950 <sup>a</sup>             | 2.057                         | 1.836 <sup>g</sup>                     | 110.6                            | 0.2                                      | 0.0                                   |
|                                | (CH <sub>3</sub> CHO)Li <sup>+</sup> Gly | 1.914                          | 2.110                         | 1.837 <sup>g</sup>                     | 114.7                            | 0.4                                      | 6.5                                   |
|                                | Li <sup>+</sup> (CH <sub>3</sub> CHO)    | 1.766                          |                               |                                        | 175.0                            | 172.1                                    |                                       |

<sup>a</sup> The Li<sup>+</sup>–OH(CO) distance. <sup>b</sup> The Li<sup>+</sup>–OH<sub>2</sub> distance. <sup>c</sup>  $\angle\text{NC}_\alpha\text{C}_\beta\text{O}$  (°). <sup>d</sup> The Li<sup>+</sup>–C<sub>α</sub> distance. <sup>e</sup>  $\angle\text{Li}^+\text{O}(\text{H})\text{C}_\beta\text{C}_\alpha$  (°). <sup>f</sup>  $\angle\text{NC}_\alpha\text{C}_\beta\text{O}(\text{H})$  (°). <sup>g</sup> The Li<sup>+</sup>–OCHX distance. <sup>h</sup>  $\angle\text{Li}^+\text{O}(\text{H})\text{C}$  (°). <sup>i</sup>  $\angle\text{Li}^+\text{O}(\text{H})\text{CC}_\alpha$  (°). <sup>j</sup>  $\angle\text{NC}_\alpha\text{CO}(\text{H})$  (°). <sup>k</sup> The Li<sup>+</sup>–OH(COH) distance.

## Figure Captions

**Figure S1.** Optimized structures of (AA – M) and (M)Li<sup>+</sup>(AA – M) where X = H for (Ser – H<sub>2</sub>O) = Apa, Abl, and Aca, (Ser – CO<sub>2</sub>) = Eam and May, and (Ser – XCHO) = Cay and Ade; and X = CH<sub>3</sub> for (Thr – H<sub>2</sub>O) = Aba, Ambl, and Amca, (Thr – CO<sub>2</sub>) = Pam and Eay, and (Thr – XCHO) = Cay and Ade calculated at the B3LYP/6-311+G(d,p) level of theory. Relative energies in kJ/mol calculated at the MP2(full)/6-311+G(2d,2p) with zero point energy corrections included are shown for Ser, with values in parentheses corresponding to species derived from Thr. Dashed lines show hydrogen bonds with bond lengths indicated in Å for X = H (values for X = CH<sub>3</sub> in parentheses).

**Figure S2.** Calculated potential energy surface for rearrangement of (H<sub>2</sub>O)Li<sup>+</sup>Aca conformers at the MP2(full)/6-311+G(2d,2p)//B3LYP/6-311+G(d,p) level of theory.

**Figure S3.** Calculated potential energy surface for loss of H<sub>2</sub>O from Li<sup>+</sup>Ser by transfer of hydrogen from the carboxylic acid group to the side-chain hydroxyl oxygen at the MP2(full)/6-311+G(2d,2p)//B3LYP/6-311+G(d,p) level of theory. The notation describing each transition state and intermediate is described in the text. See Figure 4 for the steps between Li<sup>+</sup>Ser and IM<sub>N2</sub>.

**Figure S4.** Calculated potential energy surface for loss of H<sub>2</sub>O from Li<sup>+</sup>Ser by transfer of hydrogen from C<sub>α</sub> at the MP2(full)/6-311+G(2d,2p)//B3LYP/6-311+G(d,p) level of theory. The notation describing each transition state and intermediate is described in the text.

**Figure S5.** Calculated potential energy surface for rearrangement of (CO<sub>2</sub>)Li<sup>+</sup>May conformers at the MP2(full)/6-311+G(2d,2p)//B3LYP/6-311+G(d,p) level of theory.

**Figure S6.** Calculated potential energy surface for loss of CO<sub>2</sub> from Li<sup>+</sup>Ser by transfer of the carboxylic acid hydrogen to C<sub>α</sub> at the MP2(full)/6-311+G(2d,2p)//B3LYP/6-311+G(d,p) level of theory. The notation describing each transition state and intermediate is described in the text.

**Figure S7.** Calculated potential energy surface for rearrangement of (HCHO)Li<sup>+</sup>Cay conformers at the MP2(full)/6-311+G(2d,2p)//B3LYP/6-311+G(d,p) level of theory.

**Figure S8.** Calculated potential energy surface for loss of HCHO from Li<sup>+</sup>Ser by transfer of the hydroxyl hydrogen to the carbonyl oxygen to form Li<sup>+</sup>Ade at the MP2(full)/6-311+G(2d,2p)//B3LYP/6-311+G(d,p) level of theory. The notation describing each transition state and intermediate is described in the text.

**Figure S9.** Calculated potential energy surface for rearrangement of (HCHO)Li<sup>+</sup>Cay conformers at the MP2(full)/6-311+G(2d,2p)//B3LYP/6-311+G(d,p) level of theory.
